# Supplementary material
Source: PubMed Central journal article supplement (PMC11027829)
Supplement: 262_2020_2500_MOESM1_ESM.pdf [file 262_2020_2500_MOESM1_ESM.pdf]

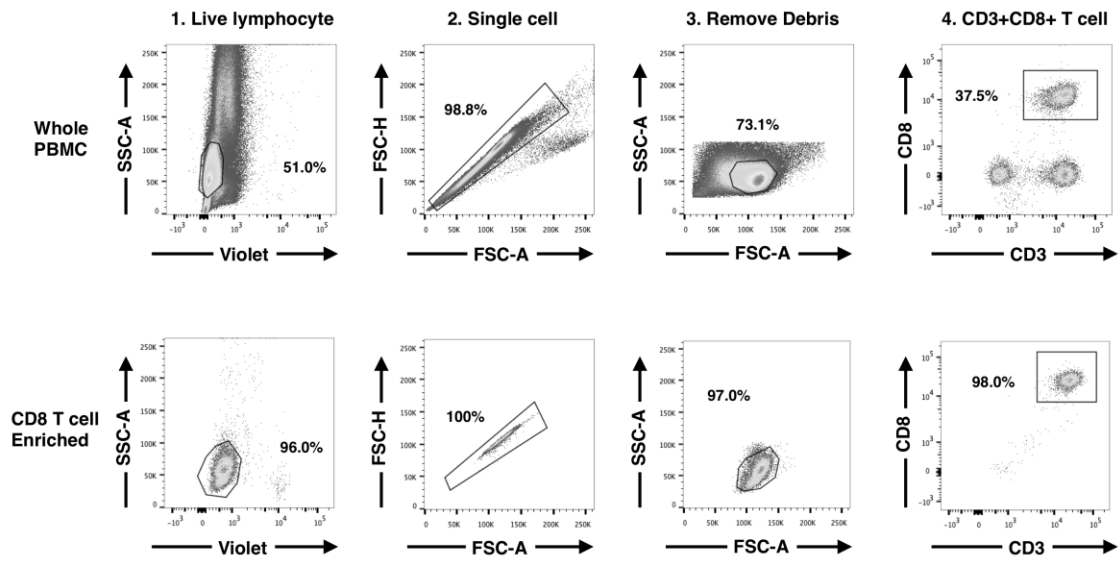

**Supplementary Figure. Gating strategy of CD8<sup>+</sup> T cells from PBMCs.**

CD8<sup>+</sup> T cells were gated from total PBMCs by gating on live lymphocytes, single cells, debris removal, and then CD3<sup>+</sup>CD8<sup>+</sup> T cells.
